# Supplementary material for: External validation and comparison of the Glasgow-Blatchford score, modified Glasgow-Blatchford score, Rockall score and AIMS65 score in patients with upper gastrointestinal bleeding: a cross-sectional observational study in Western Switzerland
Source: PubMed Central journal article supplement — Eur J Emerg Med. 2022 Nov 10;30(1):32–9. doi: 10.1097/MEJ.0000000000000983 (PMC10405788; doi:10.1097/mej.0000000000000983), 2022-11-10
Supplement: ejem-30-32-s001.pdf [file ejem-30-32-s001.pdf]

## ADDITIONAL FILES

**Supplement table 1. Description of the variables included in each UGIB scores.**

|                                 | Glasgow-Blatchford |    | Modified Glasgow-Blatchford | Rockall (pre-endoscopy)                               |    | AIMS 65 |    |
|---------------------------------|--------------------|----|-----------------------------|-------------------------------------------------------|----|---------|----|
| Age (years)                     |                    |    |                             |                                                       |    |         |    |
| <60                             |                    |    |                             |                                                       | 0  |         |    |
| 60-79                           |                    |    |                             |                                                       | +1 |         |    |
| ≥ 65                            |                    |    |                             |                                                       |    |         | +1 |
| ≥80                             |                    |    |                             |                                                       | +2 |         |    |
| Initial systolic blood pressure | >100-109           | +1 | +1                          | SBP≥100 and HR<100                                    | 0  |         |    |
|                                 | 90-99              | +2 | +2                          | SBP≥100 and HR≥100                                    | +1 |         |    |
|                                 | <90                | +3 | +3                          | SBP<100                                               | +2 | ≤90     | +1 |
| Heart rate ≥ 100                |                    | +1 | +1                          |                                                       |    |         |    |
| Melena present                  |                    | +1 | -                           |                                                       |    |         |    |
| Recent syncope                  |                    | +2 | -                           |                                                       |    |         |    |
| Hepatic disease                 |                    | +2 | -                           | No comorbidity                                        | 0  |         |    |
| Cardiac failure                 |                    | +2 | -                           | Any comorbidity (except)                              | +2 |         |    |
| Hemoglobin                      |                    |    |                             | Renal, hepatic failure and/or disseminated malignancy | +3 |         |    |
| For women ≥100 and <120         |                    | +1 | +1                          |                                                       |    |         |    |
| <100                            |                    | +6 | +6                          |                                                       |    |         |    |
| For men ≥ 120 and <130          |                    | +1 | +1                          |                                                       |    |         |    |
| ≥100 and <120                   |                    | +3 | +3                          |                                                       |    |         |    |
| <100                            |                    | +6 | +6                          |                                                       |    |         |    |
| Blood urea nitrogen (mmol/l)    |                    |    |                             |                                                       |    |         |    |
| 6.5 -8                          |                    | +2 | +2                          |                                                       |    |         |    |
| 8-10                            |                    | +3 | +3                          |                                                       |    |         |    |
| 10-25                           |                    | +4 | +4                          |                                                       |    |         |    |
| ≥ 25                            |                    | +6 | +6                          |                                                       |    |         |    |
| Albumin <30 g/l                 |                    |    |                             |                                                       |    |         | +1 |
| INR >1.5                        |                    |    |                             |                                                       |    |         | +1 |
| Alteration in mental status     |                    |    |                             |                                                       |    |         | +1 |

**Supplementary Figure 1:** Sensitivity/Specificity of UGIB scores predicting need for intervention or in-hospital death by threshold

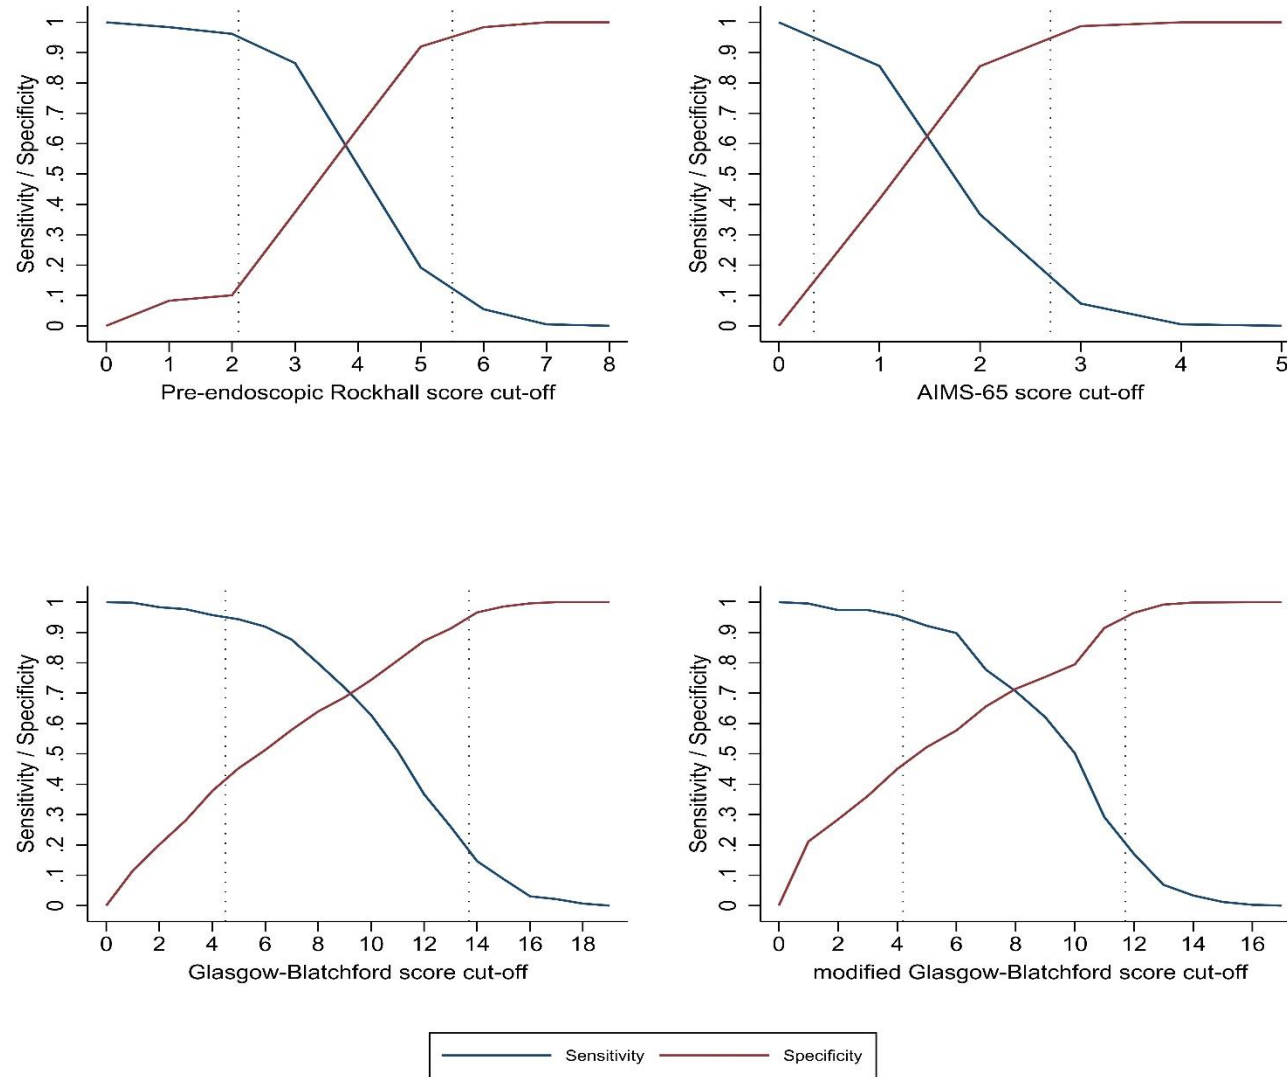

Supplementary Figure 2: Calibration curves for AIMS 65 and pre-endoscopic Rockall score

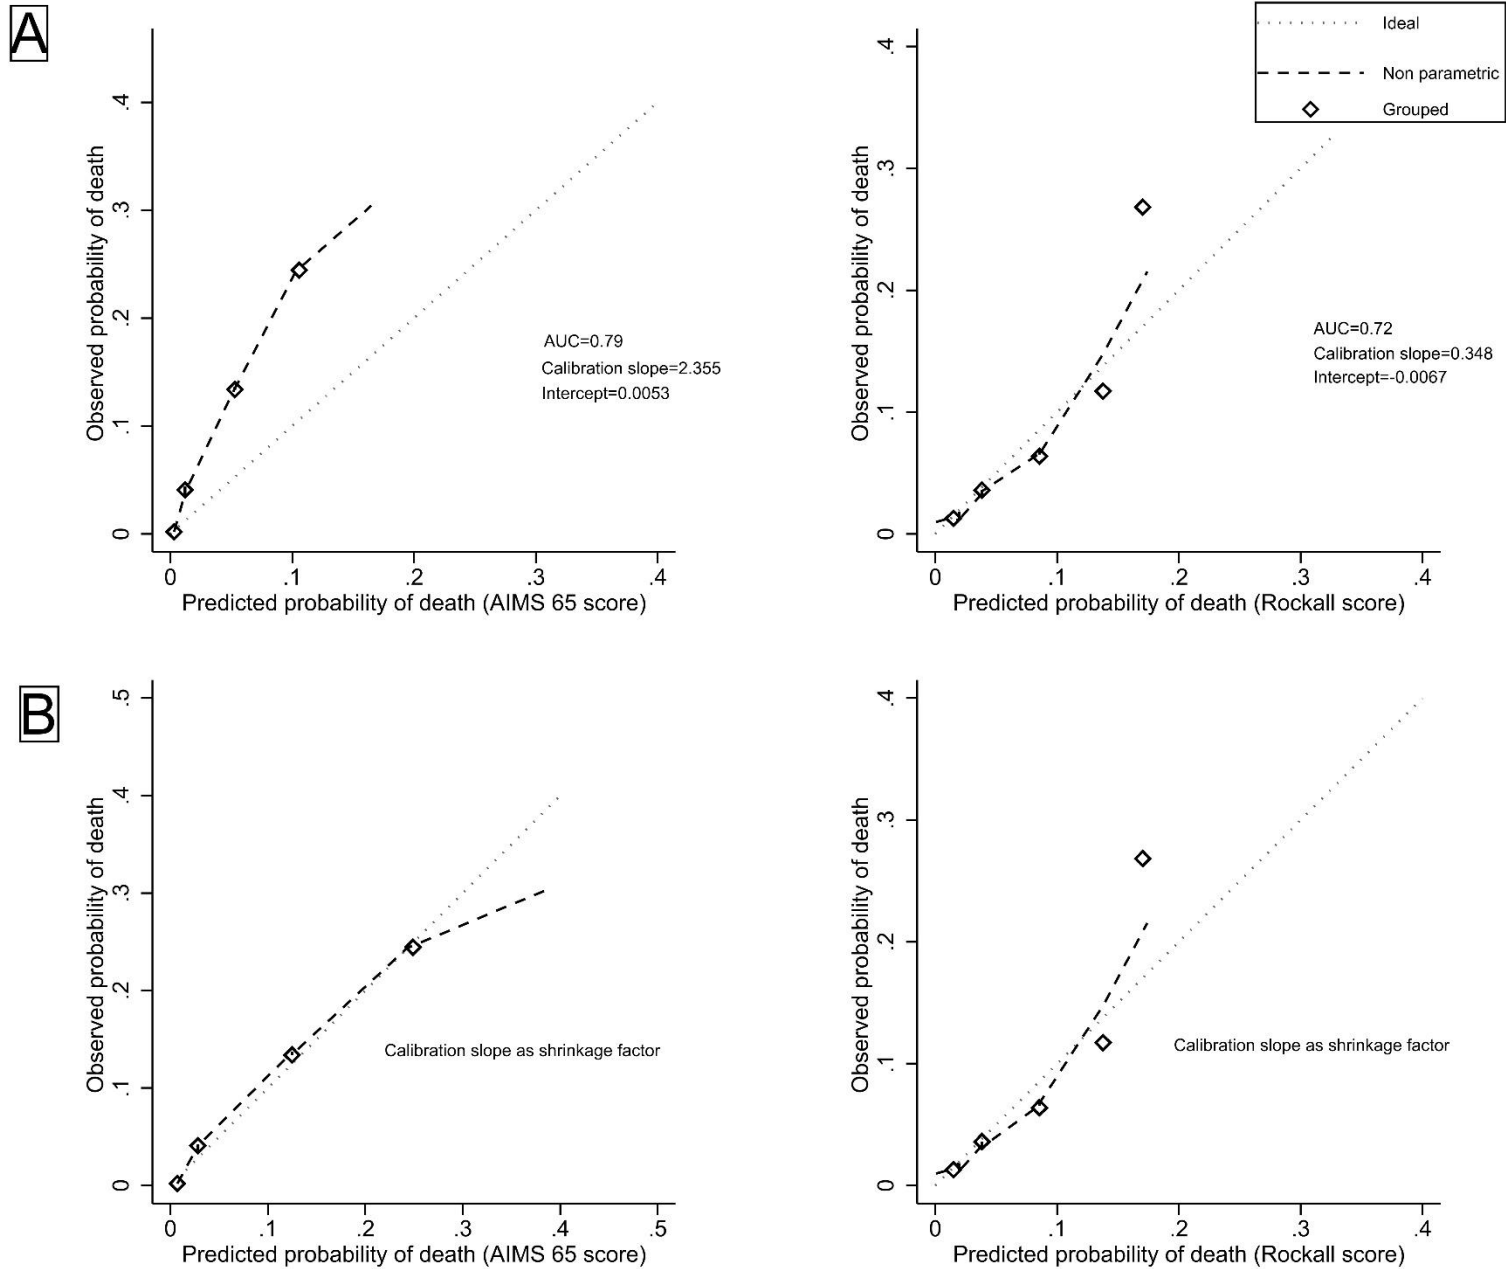

A: Calibration curves using the initial published prediction

B: Calibration curves corrected by using calibration slope as a shrinkage factor

**Supplementary Table 2:** Positive (PPV) and negative predictive value (NPV) and positive and negative likelihood ratio (LR) by scores' threshold.

| PERS - Primary outcome (Need for intervention or in-hospital death) |             |             |       |      |      |      |
|---------------------------------------------------------------------|-------------|-------------|-------|------|------|------|
| Threshold                                                           | Sensibility | Specificity | PPV   | NPV  | LR + | LR - |
| 0                                                                   | 98.3        | 8.3         | 29.2  | 92.9 | 1.1  | 0.2  |
| 1                                                                   | 96.2        | 10.1        | 29.1  | 87.4 | 1.1  | 0.4  |
| 2                                                                   | 86.5        | 37.4        | 34.7  | 87.8 | 1.4  | 0.4  |
| 3                                                                   | 52.8        | 65.0        | 36.7  | 78.2 | 1.5  | 0.7  |
| 4                                                                   | 19.2        | 92.0        | 47.9  | 74.8 | 2.4  | 0.9  |
| 5                                                                   | 5.5         | 98.4        | 56.1  | 73.0 | 3.3  | 1.0  |
| 6                                                                   | 0.5         | 100.0       | 100.0 | 72.4 | -    | 1.0  |

| AIMS 65 - Primary outcome (Need for intervention or in-hospital death) |             |             |       |      |      |      |
|------------------------------------------------------------------------|-------------|-------------|-------|------|------|------|
| Threshold                                                              | Sensibility | Specificity | PPV   | NPV  | LR + | LR - |
| 0                                                                      | 85.6        | 41.8        | 36.1  | 88.3 | 1.5  | 0.3  |
| 1                                                                      | 36.7        | 85.5        | 49.4  | 77.9 | 2.5  | 0.7  |
| 2                                                                      | 7.4         | 98.7        | 68.9  | 73.5 | 5.8  | 0.9  |
| 3                                                                      | 0.5         | 100.0       | 100.0 | 72.4 |      | 1.0  |

| GBS - Primary outcome (Need for intervention or in-hospital death) |             |             |       |      |      |      |
|--------------------------------------------------------------------|-------------|-------------|-------|------|------|------|
| Threshold                                                          | Sensibility | Specificity | PPV   | NPV  | LR + | LR - |
| 0                                                                  | 99.8        | 11.6        | 30.2  | 99.2 | 1.1  | 0.02 |
| 1                                                                  | 98.3        | 20.0        | 32.1  | 96.9 | 1.2  | 0.08 |
| 2                                                                  | 97.6        | 28.1        | 34.3  | 96.9 | 1.4  | 0.08 |
| 3                                                                  | 95.7        | 37.8        | 37.1  | 95.8 | 1.5  | 0.11 |
| 4                                                                  | 94.3        | 45.3        | 39.8  | 95.4 | 1.7  | 0.13 |
| 5                                                                  | 91.9        | 51.2        | 42.0  | 94.3 | 1.9  | 0.16 |
| 6                                                                  | 87.7        | 57.9        | 44.4  | 92.4 | 2.1  | 0.21 |
| 7                                                                  | 79.9        | 64.0        | 46.0  | 89.2 | 2.2  | 0.31 |
| 8                                                                  | 71.8        | 68.6        | 46.8  | 86.4 | 2.3  | 0.41 |
| 9                                                                  | 62.8        | 74.3        | 48.4  | 83.9 | 2.4  | 0.50 |
| 10                                                                 | 50.9        | 80.7        | 50.4  | 81.1 | 2.6  | 0.61 |
| 11                                                                 | 36.7        | 87.2        | 52.4  | 78.2 | 2.9  | 0.72 |
| 12                                                                 | 26.1        | 91.3        | 53.4  | 76.3 | 3.0  | 0.81 |
| 13                                                                 | 14.7        | 96.5        | 62    | 74.7 | 4.2  | 0.88 |
| 14                                                                 | 8.8         | 98.5        | 69.8  | 73.8 | 6.0  | 0.92 |
| 15                                                                 | 3.1         | 99.6        | 72.2  | 72.8 | 6.8  | 0.97 |
| 16                                                                 | 2.1         | 100.0       | 100.0 | 72.7 | -    | 0.98 |
| 17                                                                 | 0.7         | 100.0       | 100.0 | 72.4 | -    | 0.99 |

| mGBS - Primary outcome (Need for intervention or in-hospital death) |             |             |       |      |      |      |
|---------------------------------------------------------------------|-------------|-------------|-------|------|------|------|
| Threshold                                                           | Sensibility | Specificity | PPV   | NPV  | LR + | LR - |
| 0                                                                   | 99.5        | 21.1        | 32.6  | 99.1 | 1.3  | 0.02 |
| 1                                                                   | 97.4        | 28.4        | 34.3  | 96.6 | 1.4  | 0.09 |
| 2                                                                   | 97.4        | 36.1        | 36.9  | 97.3 | 1.5  | 0.07 |
| 3                                                                   | 95.5        | 45.0        | 40.0  | 96.3 | 1.7  | 0.1  |
| 4                                                                   | 92.2        | 52.2        | 42.6  | 94.6 | 1.9  | 0.15 |
| 5                                                                   | 89.8        | 57.7        | 44.9  | 93.6 | 2.1  | 0.17 |
| 6                                                                   | 77.7        | 65.6        | 46.5  | 88.5 | 2.3  | 0.34 |
| 7                                                                   | 70.6        | 71.4        | 48.7  | 86.4 | 2.5  | 0.41 |
| 8                                                                   | 62.1        | 75.3        | 49.2  | 83.8 | 2.5  | 0.50 |
| 9                                                                   | 50.2        | 79.4        | 48.4  | 80.6 | 2.4  | 0.62 |
| 10                                                                  | 29.2        | 91.5        | 56.7  | 77.1 | 3.4  | 0.77 |
| 11                                                                  | 17.1        | 96.5        | 64.9  | 75.2 | 4.8  | 0.86 |
| 12                                                                  | 6.9         | 99.2        | 76.3  | 73.5 | 8.4  | 0.93 |
| 13                                                                  | 3.3         | 99.8        | 87.5  | 72.9 | 18.2 | 0.97 |
| 14                                                                  | 1.2         | 99.9        | 83.3  | 72.5 | 13.0 | 0.99 |
| 15                                                                  | 0.2         | 99.9        | 100.0 | 72.3 | -    | 1.00 |
| 16                                                                  | 0           | 100.0       | -     | 72.3 | -    | 1.00 |

| PERS - Secondary outcome (In-hospital death) |             |             |      |      |      |      |
|----------------------------------------------|-------------|-------------|------|------|------|------|
| Threshold                                    | Sensibility | Specificity | PPV  | NPV  | LR + | LR - |
| 0                                            | 100.0       | 6.8         | 5.3  | 100  | 1.1  | 0    |
| 1                                            | 97.4        | 8.7         | 5.3  | 98.4 | 1.1  | 0.3  |
| 2                                            | 92.1        | 32.0        | 6.6  | 98.7 | 1.4  | 0.2  |
| 3                                            | 71.1        | 61.7        | 8.9  | 97.6 | 1.9  | 0.5  |
| 4                                            | 34.2        | 90.1        | 15.4 | 96.3 | 3.5  | 0.7  |
| 5                                            | 14.5        | 97.9        | 26.8 | 95.6 | 7.0  | 0.9  |
| 6                                            | 0.0         | 99.9        | -    | 95.0 | -    | 1.0  |

| AIMS 65 - Secondary outcome (In-hospital death) |             |             |      |      |      |      |
|-------------------------------------------------|-------------|-------------|------|------|------|------|
| Threshold                                       | Sensibility | Specificity | PPV  | NPV  | LR + | LR - |
| 0                                               | 98.7        | 35.9        | 7.5  | 99.8 | 1.5  | 0.04 |
| 1                                               | 61.8        | 81.5        | 15.0 | 97.6 | 3.3  | 0.5  |
| 2                                               | 14.5        | 97.7        | 24.4 | 95.6 | 6.2  | 0.9  |
| 3                                               | 0.0         | 99.9        | 0    | 95.0 | 0    | 1.0  |
| 4                                               | 0.0         | 100.0       | -    | 95.0 | -    | 1.0  |

| GBS - Secondary outcome (In-hospital death) |             |             |      |      |      |      |
|---------------------------------------------|-------------|-------------|------|------|------|------|
| Threshold                                   | Sensibility | Specificity | PPV  | NPV  | LR + | LR - |
| 0                                           | 100.0       | 8.9         | 5.5  | 100  | 1.1  | 0    |
| 1                                           | 96.1        | 15.5        | 5.6  | 98.7 | 1.1  | 0.25 |
| 2                                           | 96.1        | 21.9        | 6.1  | 99.1 | 1.2  | 0.18 |
| 3                                           | 94.7        | 29.7        | 6.6  | 99.1 | 1.3  | 0.18 |
| 4                                           | 92.1        | 35.7        | 7.0  | 98.9 | 1.4  | 0.22 |
| 5                                           | 86.8        | 40.6        | 7.1  | 98.3 | 1.5  | 0.32 |
| 6                                           | 82.9        | 46.7        | 7.6  | 98.1 | 1.6  | 0.37 |
| 7                                           | 73.7        | 53.2        | 7.6  | 97.5 | 1.6  | 0.50 |
| 8                                           | 64.5        | 58.6        | 7.6  | 96.9 | 1.6  | 0.61 |
| 9                                           | 56.6        | 65.1        | 7.9  | 96.6 | 1.6  | 0.67 |
| 10                                          | 47.4        | 72.9        | 8.4  | 96.3 | 1.8  | 0.72 |
| 11                                          | 36.8        | 81.5        | 9.5  | 96.1 | 2.0  | 0.78 |
| 12                                          | 25.0        | 87.1        | 16.0 | 95.7 | 1.9  | 0.86 |
| 13                                          | 21.1        | 94.2        | 17.0 | 95.8 | 3.6  | 0.84 |
| 14                                          | 11.8        | 96.9        | 22.2 | 95.4 | 3.9  | 0.91 |
| 15                                          | 5.3         | 99.0        | 22.2 | 95.2 | 5.4  | 0.96 |
| 16                                          | 2.6         | 99.5        | 33.3 | 95.1 | 5.4  | 0.98 |
| 17                                          | 1.3         | 99.9        | -    | 95.1 | 9.5  | 0.99 |
| 18                                          | 0.0         | 100.00      |      | 95.0 | -    | 1.00 |

| mGBS - Secondary outcome (In-hospital death) |             |             |      |      |      |      |
|----------------------------------------------|-------------|-------------|------|------|------|------|
| Threshold                                    | Sensibility | Specificity | PPV  | NPV  | LR + | LR - |
| 0                                            | 98.68       | 16.12       | 5.8  | 99.6 | 1.2  | 0.08 |
| 1                                            | 96.05       | 22.15       | 6.1  | 99.1 | 1.2  | 0.18 |
| 2                                            | 96.05       | 28.03       | 6.6  | 99.3 | 1.3  | 0.14 |
| 3                                            | 93.42       | 35.22       | 7.1  | 99.0 | 1.4  | 0.19 |
| 4                                            | 88.16       | 41.38       | 7.3  | 98.5 | 1.5  | 0.29 |
| 5                                            | 84.21       | 46.02       | 7.6  | 98.2 | 1.6  | 0.34 |
| 6                                            | 73.68       | 55.02       | 7.9  | 97.5 | 1.6  | 0.48 |
| 7                                            | 67.11       | 61.18       | 8.3  | 97.2 | 1.7  | 0.54 |
| 8                                            | 60.53       | 66.30       | 8.6  | 97.0 | 1.8  | 0.60 |
| 9                                            | 47.37       | 72.18       | 8.2  | 96.3 | 1.7  | 0.73 |
| 10                                           | 31.58       | 86.64       | 11.1 | 96.0 | 2.4  | 0.79 |
| 11                                           | 21.05       | 93.43       | 14.4 | 95.7 | 3.2  | 0.85 |
| 12                                           | 13.16       | 98.06       | 26.3 | 95.5 | 6.8  | 0.89 |
| 13                                           | 6.58        | 99.24       | 31.3 | 95.3 | 8.6  | 0.94 |
| 14                                           | 1.32        | 99.65       | 16.7 | 95.0 | 3.8  | 0.99 |
| 15                                           | 0.00        | 99.93       | 0    | 95.0 | 0    | 1.00 |
| 16                                           | 0.00        | 100.00      | -    | 95.0 | -    | 1.00 |
